# Supplementary material
Source: publisher site journal article supplement (https://www.dovepress.com/article/318874)
Supplement: Supplementary file 1 [file get_supplementary_file.php]

| **Supplementary Table 1.** Proportions of Subjects Achieving Clinical Significant Improvements | | | | | |
| --- | --- | --- | --- | --- | --- |
| Time Point | TA,  n/n (%) a | SA, n/n (%) a | OR (SA as reference) | 95% CI | *P*-value b |
| *Sleep Diary-Derived Sleep Parameters* | |  |  |  |  |
| Sleep-onset Latency <30 minutes | |  |  |  |  |
| 1-week Posttreatment | 37/65 (56.9) | 33/68 (48.5) | 1.40 | 0.71-2.78 | 0.33 |
| 5-week Posttreatment | 37/63 (58.7) | 34/66 (51.5) | 1.34 | 0.67-2.69 | 0.41 |
| Wake after Sleep Onset <30 minutes | |  |  |  |  |
| 1-week Posttreatment | 38/65 (58.5) | 36/68 (52.9) | 1.25 | 0.63-2.48 | 0.52 |
| 5-week Posttreatment | 38/63 (60.3) | 41/66 (62.1) | 0.93 | 0.46-1.88 | 0.83 |
| Sleep Efficiency≥85% | |  |  |  |  |
| 1-week Posttreatment | 22/65 (33.8) | 21/68 (30.9) | 1.15 | 0.55-2.37 | 0.72 |
| 5-week Posttreatment | 35/63 (55.6) | 24/66 (36.4) | 2.19 | 1.08-4.43 | 0.03 |
| Abbreviations: ISI, Insomnia Severity Index; SA, Sham-acupuncture; OR, Odds ratio; CI, Confidence interval; SOL, Sleep-onset latency; TA, Traditional-acupuncture; WASO, Wake after sleep onset.  a Number of participants meeting criterion from total number of participants analyzed.  b Group differences in the likelihood of achieving clinically significant improvement were compared with logistic regression.  c An optimal cut-off identifying participants with marked improvements as suggested by Morin et al 2011. | | | | | |

| Supplementary Table 2. Report of Adverse Events across Study Time Points | | | | |
| --- | --- | --- | --- | --- |
| Variables a | All sample (N=140) | TA (N=70) | SA (N=70) | *P*-value b |
| *During Treatment* |  |  |  |  |
| Pain around needle sites | 18 (12.9) | 11 (15.7) | 7 (10.0) | 0.31 |
| Bruise around needle sites | 13 (9.3) | 13 (18.6) | 0 (0.0) | <0.001 |
| Dizziness | 7 (5.0) | 2 (2.9) | 5 (7.1) | 0.44 |
| Bleeding around needle sites | 6 (4.3) | 6 (8.6) | 0 (0.0) | 0.03 |
| Paresthesia | 5 (3.6) | 3 (4.3) | 2 (2.9) | 1.00 |
| Headache or other pain symptoms | 4 (2.9) | 3 (4.3) | 1 (1.4) | 0.62 |
| Fatigue | 2 (1.4) | 0 (0.0) | 2 (2.9) | 0.50 |
| Reaction around needle sites | 1 (0.7) | 0 (0.0) | 1 (1.4) | 1.00 |
| Unusual relaxation | 1 (0.7) | 0 (0.0) | 1 (1.4) | 1.00 |
| Gastrointestinal symptoms | 1 (0.7) | 1 (1.4) | 0 (0.0) | 1.00 |
| Other adverse event | 1 (0.7) | 0 (0.0) | 1 (1.4) | 1.00 |
| *During Follow-up Period* |  |  |  |  |
| Headache or other pain symptoms | 11 (8.1) | 6 (9.1) | 5 (7.2) | 0.76 |
| Fatigue | 10 (7.4) | 5 (7.6) | 5 (7.2) | 1.00 |
| Dizziness | 6 (4.4) | 2 (3.0) | 4 (5.8) | 0.68 |
| Paresethesia | 5 (3.7) | 2 (3.0) | 3 (4.3) | 1.00 |
| Gastrointestinal symptoms | 5 (3.7) | 3 (4.5) | 2 (2.9) | 0.68 |
| Bruise around needle sites | 4 (3.0) | 4 (6.1) | 0 (0.0) | 0.05 |
| Unusual relaxation | 3 (2.2) | 1 (1.5) | 2 (2.9) | 1.00 |
| Dermatological problems | 3 (2.2) | 2 (3.0) | 1 (1.4) | 0.61 |
| Reaction around needle sites | 2 (1.5) | 1 (1.5) | 1 (1.4) | 1.00 |
| Other adverse event | 2 (1.5) | 2 (3.0) | 0 (0.0) | 0.24 |
| Abbreviations: SA, Sham-acupuncture; TA, Traditional-acupuncture.  a Data are presented as number (%). b Chi-square was used for comparison. | | | | |
